# Supplementary material for: Biotin-decorated silica coated PbS nanocrystals emitting in the second biological near infrared window for bioimaging
Source: Royal Society of Chemistry journal article supplement (doi:10.1039/c4nr01025f), 2014-01-01
Supplement: c4nr01025f1.pdf [file c4nr01025f1.pdf]

ARTICLE

Supporting Information

Cite this: DOI: 10.1039/x0xx00000x

Received 00th January 2012,  
Accepted 00th January 2012

DOI: 10.1039/x0xx00000x

www.rsc.org/

## Biotin-decorated silica coated PbS nanocrystals emitting in the second biological near infrared window for bioimaging

M. Corricelli,<sup>†,a,b</sup> N. Depalo,<sup>†,b</sup> E. Di Carlo,<sup>a</sup> E. Fanizza,<sup>a,b</sup> V. Laquintana,<sup>c</sup> N. Denora,<sup>c</sup> A. Agostiano,<sup>a,b</sup> M. Striccoli,<sup>b</sup> M. L. Curri,<sup>\*,b</sup>

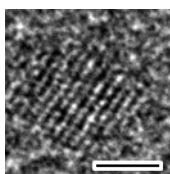

**Figure S1:** HRTEM micrograph of PbS NCs (scale bar = 2nm).

HRTEM analysis has been carried out by a Jeol 2200FS microscope with spherical aberration-corrected objective lens, equipped with a Field Emission Gun (FEG) and working at an acceleration voltage of 200 kV. The HRTEM micrograph has been recorded by a Gatan Ultrascan 1000 CCD camera.

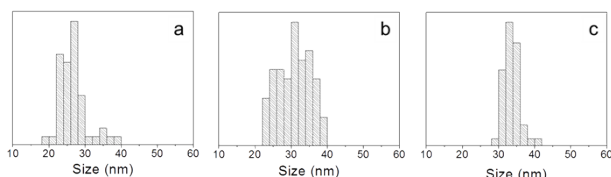

**Figure S2:** Size distribution histograms of PbS@SiO<sub>2</sub> samples prepared with 700  $\mu$ L of Igepal, 400  $\mu$ L of ammonia, 30  $\mu$ L of TEOS achieving a PbS NC concentration of  $6.1 \cdot 10^{-6}$  M (a) and  $9.5 \cdot 10^{-6}$  M (b). Size distribution histogram of PbS@SiO<sub>2</sub> sample prepared with 700  $\mu$ L of Igepal, 400  $\mu$ L of ammonia, 80  $\mu$ L of TEOS, achieving a PbS NC concentration of  $6.1 \cdot 10^{-6}$  M (c).

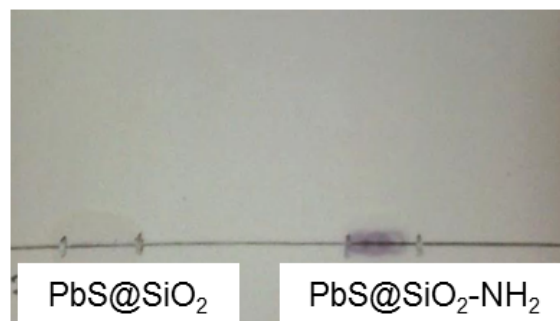

**Figure S3:** TLC plate with deposited drops of and amine-functionalized silica PbS NPs after spraying the ninhydrin/2,6-lutidine solution in acetone.

The presence of the amine groups onto silica coated PbS NP surface after functionalization by means of APS has been detected by performing a thin layer chromatography (TLC) analysis and using a suitable ninhydrin solution. In particular, a ninhydrin test has been here suitably employed for the characterization of amine-functionalized silica coated NPs<sup>1</sup>. The ninhydrin solution has been preliminary prepared by dissolving 110 mg of ninhydrin in 16 mL of acetone (0.68% w/v) and adding 4 mL of 2,6-lutidine. For the qualitative TLC analysis, a drop of the amine functionalized PbS@SiO<sub>2</sub> NP solution has been loaded on the TLC plate and sprayed with the ninhydrin solution. The presence of amino groups has been confirmed by the formation of a blue coloured spot ascribed to the Ruhemanns by-product (Figure S2).

**Table S1.** Hydrodynamic diameter (Size), polydispersity (PDI) and  $\zeta$ -potential of PbS@SiO<sub>2</sub> NPs, biotinylated PbS@SiO<sub>2</sub> NPs (PbS@SiO<sub>2</sub>/biotin NPs) and biotinylated PbS@SiO<sub>2</sub> NPs functionalized with streptavidin-FITC (PbS@SiO<sub>2</sub>/biotin/streptavidin NPs).

|                                               | Size (nm) | PDI       | $\zeta$ -potential (mV) |
|-----------------------------------------------|-----------|-----------|-------------------------|
| PbS@SiO <sub>2</sub> NPs                      | 36±2      | 0.27±0.02 | -29.5±0.8               |
| PbS@SiO <sub>2</sub> /biotin NPs              | 41±3      | 0.34±0.02 | -22.7±0.3               |
| PbS@SiO <sub>2</sub> /biotin/streptavidin NPs | 48±1      | 0.22±0.01 | -28.4±0.4               |

## Notes and references

<sup>a</sup> Dipartimento di Chimica, Università degli Studi di Bari, Via Orabona 4, I-70126, Bari, Italy.

<sup>b</sup> CNR-IPCF c/o Dipartimento di Chimica, Università degli Studi di Bari, Via Orabona 4, I-70125, Bari, Italy. \* Tel.: +39 (0)80 5442027. E-mail: lucia.curri@ba.ipcf.cnr.it.

<sup>c</sup> Dipartimento di Farmacia - Scienze del farmaco, Università degli Studi di Bari, Via Orabona 4, I-70126, Bari, Italy.

‡These authors contributed equally.

1. N. Depalo, L. Catucci, A. Mallardi, A. Corcelli, A. Agostiano, *Bioelectrochemistry*, 2004, **63**, 103.
